# Supplementary material for: Utility of Host Markers Detected in Quantiferon Supernatants for the Diagnosis of Tuberculosis in Children in a High-Burden Setting
Source: PLoS One. 2013 May 15;8(5):e64226. doi: 10.1371/journal.pone.0064226 (PMC3655018; doi:10.1371/journal.pone.0064226)
Supplement: Table S3 — General discriminant analysis (GDA) models for discriminating between TB disease and no TB. The influence of outliers was scaled down by trimming the data and the GDA analysis done in all study participants, regardless of HIV infection or QFT-IT results. In each case, effect df = 1, error df = 70. P- values for all the models were <0.0001. N = unstimulated marker levels, Ag = levels detected in antigen stimulated supernatant, Ag-N = Antigen specific marker levels obtained after background correction. (DOCX) [file pone.0064226.s003.docx]

**Table S3:** **General discriminant analysis (GDA) models for discriminating between TB disease and no TB**. The influence of outliers was scaled down by trimming the data and the GDA analysis done in all study participants, regardless of HIV infection or QFT results. In each case, effect df =1, error df = 70. P- Values for all the models were < 0.0001. N = unstimulated marker levels, Ag = levels detected in antigen stimulated supernatant, Ag-N = Antigen specific marker levels obtained after background correction.

| Analytes | Resubstitution Classification matrix | | | Leave-one-out Cross validation | | Wilks lambda | f |
| --- | --- | --- | --- | --- | --- | --- | --- |
| No TB (%) | TB (%) | Total (%) | No TB (%) | TB (%) |  |  |
| IFN-α2Ag IP-10N IL-1RaN sCD40LAg TGF-αAg | 82.5 (47/57) | 89.5 (17/19) | 84.2 (64/76) | 80.7 (46/57) | 73.7 (14/19) | 0.534 | 61.0 |
| IFN-α2N IL-1RaN IP-10N sCD40LAg TGF-αAg-N | 84.2 (48/57 | 84.2 (16/19) | 84.2 (64/76) | 78.9 (45/57) | 73.7 (14/19) | 0..512 | 66.8 |
| IL-1RaN IL-1αN IP-10N sCD40LAg TGF-αAg-N | 84.2 (48/57) | 89.5 (17/19) | 85.5 (65/76) | 82.5 (47/57)) | 84.2 (16/19) | 0.476 | 77.1 |
| IFN-α2Ag IL-1RaN IL-1raAg IP-10N sCD40LAg | 84.2 (48/57) | 78.9 (15/19) | 82.9 (63/76) | 84.2 (48/47) | 73.7 (14/19) | 0.480 | 75.7 |
| IFN-α2Ag IL-1RaN IP-10N sCD40LAg TNF-αAg | 86.0 (49/57) | 84.2 (16/19) | 85.5 (65/76) | 82.5 (47/57) | 73.7 (14/19) | 0.467 | 79.8 |
| IFN-α2N IL-1RaN IL-1RaAg IP-10N sCD40LAg | 84.2 (48/57) | 78.9 (15/19) | 82.9 (63/76) | 84.2 (48/47) | 73.7 (14/19) | 0.467 | 79.9 |
| IL-1RaN IL-1RaAg IP-10N sCD40LAg TGF-αAg-N | 86.0 (49/57) | 78.9 (15/19) | 84.2 (64/76) | 80.7 (46/57) | 68.4 (13/19) | 0.0.426 | 94.5 |
| IL-1RaN IL-1RaAg IP-10N sCD40LAg TGF-αAg-N | 86.0 (49/57) | 84.2 (16/19) | 85.5 (65/76) | 82.5 (47/57) | 73.7 (14/19) | 0.422 | 95.8 |
| IFN-α2N IL-1RaN IP-10N sCD40LAg TNF-αAg | 84.2 (48/57) | 84.2 (16/19) | 84.2 (64/76) | 82.5 (47/57) | 73.7 (14/19) | 0.458 | 82.9 |
| IL-1RaN IP-10N sCD40LAg TGF-αAg-N TNF-αAg | 86.0 (49/57) | 84.2 (16/19) | 85.5 (65/76) | 82.5 (47/57) | 73.7 (14/19) | 0.419 | 97.0 |
| IL-1RaN IL-1α2N IP-10N sCD40LAg TNF-αAg | 86.0 (49/57) | 89.5 (17/19) | 86.8 (66/76) | 84.2 (48/47) | 68.4 (13/19) | 0.430 | 92.6 |
| IFN-α2Ag IP-10N sCD40LAg IL-1RaN IL-1RaAg | 84.2 (48/57) | 78.9 (15/19) | 82.9 (63/76) | 82.5 (47/57) | 78.9 (15/19) | 0.478 | 76.4 |
| IFN-α2Ag IL-1RaN IL-1RaAg IP-10N TGF-αAg-N | 80.7 (46/57) | 73.7 (14/19) | 78.9 (60/76) | 78.9 (45/57) | 73.7 (14/19) | 0.559 | 55.2 |
| IFN-α2N IL-1RaN IL-1RaAg IP-10N sCD40LN | 86.0 (49/57) | 78.9 (15/19) | 84.2 (64/76) | 84.2 (48/47) | 78.9 (15/19) | 0.475 | 77.3 |
| IL-1RaN IL-1RaAg IL-1αN IP-10N sCD40LAg | 86.0 (49/57) | 78.9 (15/19) | 84.2 (64/76) | 84.2 (48/47) | 73.7 (14/19) | 0.441 | 88.6 |
| IFN-α2Ag IL-1RaN IL-1RaAg IP-10N sCD40LN | 84.2 (48/57) | 78.9 (15/19) | 82.9 (63/76) | 82.5 (47/57) | 78.9 (15/19) | 0.494 | 71.7 |
| IL-1RaN IL-1αAg-N IP-10N sCD40LAg TGF-αAg-N | 87.7 (50/57) | 78.9 (15/19) | 85.5 (65/76) | 82.5 (47/57) | 78.9 (15/19) | 0.424 | 95.0 |
| IL-1RaN IL-1RaAg IL-1αN IP-10N sCD40LN | 84.2 (48/57) | 78.9 (15/19) | 82.9 (63/76) | 82.5 (47/57) | 73.7 (14/19) | 0.438 | 89.7 |
| IFN-α2N IL-1RaN IL-1RaAg-N IP-10N sCD40LAg | 84.2 (48/57) | 78.9 (15/19) | 82.9 (63/76) | 82.5 (47/57) | 78.9 (15/19) | 0.466 | 80.4 |
| IL-1RaN IL-1αN IP-10N sCD40LAg TNF-αN | 86.0 (49/57) | 89.5 (17/19) | 86.8 (66/76) | 84.2 (48/47) | 84.2 (16/19) | 0.445 | 87.2 |
